# Supplementary material for: Dpp from the anterior stripe of cells is crucial for the growth of the Drosophila wing disc
Source: eLife. 2017 Jul 4;6:e22319. doi: 10.7554/eLife.22319 (PMC5560856; doi:10.7554/eLife.22319)
Supplement: Figure 3—source data 1. — DOI: http://dx.doi.org/10.7554/eLife.22319.007 [file elife-22319-fig3-data1.xlsx]

## Sheet: Figure3-source data1
Figure.3-source data 1		Only male wing imaginal discs were included for the measurement.
	Figure. 3b			Figure. 3c			Figure. 3d			Figure. 3e
	control	experiment		control	experiment		control	experiment		control	experiment
	111450	50998.2		129048	51823.6		108304	51777.2		139701	63997.3
	78359.7	47323.1		126886	46367.1		76330.3	50811.4		137120	59908.6
	80024.3	47893		95345	33799.2		111393	53305.4		112616	89710.3
	98864.8	41956.5		95299.7	38280.8		75457.9	57936.5		110663	81492.3
	104964	51711.3		90641.1	43465.8		137289	60695.7		164932	65829.1
	109993	37038.4		92092.6	45960.4		141323	47410.1		163456	65275.2
	97755.3	39390.9		106790	36985.7		99525.3	81537		121417	73998.4
	105706	39866.4		109331	35701.5		97246.1	77899.7		125023	83584.8
	111720	43126.7		99689.1	44581.1		119670	53845.6		121901	80726.5
	108934	46483.9		102576	42853.5		119760	54322.7		120819	39188.7
	105628	45925.4		106505	41096.7		82841.3	82147.1		183132	33780.3
	101664	46595.6		110980	32063.1		81704.9	84712.6		159595	68184.5
	85600.5	41656.4		145590	46841.3		107771	81923.1		139567	69122.1
	102057	34995.8		140926	46884.3		102766	47401.5		143966	82752.5
	109020	38388.5		124156			59412	46428.9		215985	80786.7
	96766.1	36786.4		124273			54357.6	67536.1			77347.6
	106871	31649		130801			127682	68287			78750.4
	110276	37891.3		132792			148390	50720.4
		37891.3					141069	43046
		56536.6					161649	57429.6
		61057.7					159388	53743
		37953.2					111039	57019.4
		46333.8					107294	58982.4
		47789.3					104979	62895.8
		52076.2					115875	67685
		44341.6					118110	53322.6
		45392.2					135541	57368.3
		47034.4					138646	64079.2
		35637.4					115804	56318.3
		35416.8					114253	53808.3
		38018.5						59925.8
		36372.8
Average	101425	43172.8		114651	41907.4		112496	60139.4		143993	70260.9
STDEV	10384	6808.2		17404.4	5774.14		26973.5	11373.6		29094.2	15181
STDEV/Average	0.102381	0.157697		0.151803	0.137783		0.239774	0.189121		0.202053	0.216066
ttest to control		9.49605e-18			9.01614e-14			4.59892e-12			2.06155e-08
